# Supplementary material for: The proton electrochemical gradient induces a kinetic asymmetry in the symport cycle of LacY
Source: PubMed Central journal article supplement — Proc Natl Acad Sci U S A. 2019 Dec 30;117(2):977–81. doi: 10.1073/pnas.1916563117 (PMC6969543; doi:10.1073/pnas.1916563117), 2019-12-30
Supplement: pnas.1916563117.sapp.pdf [file pnas.1916563117.sapp.pdf]

# The proton electrochemical gradient induces a kinetic asymmetry in the symport cycle of LacY

Xiaoxu Jiang<sup>1a</sup>, Natalia Ermolova<sup>1</sup>, John Lim<sup>1b</sup>, Seo Woo Choi<sup>1c</sup> and H. Ronald Kaback<sup>1,2,3\*</sup>

<sup>1</sup>Department of Physiology and <sup>2</sup>Department of Microbiology, Immunology & Molecular Genetics, <sup>3</sup>Molecular Biology Institute, University of California Los Angeles, Los Angeles, CA 90095

<sup>a</sup>Present address: Department of Chemistry and Physical Sciences, Nicholls State University, Thibodaux, LA 70310

<sup>b</sup>Present address: Department of Nutritional Science and Toxicology. University of California Berkeley, Berkeley, CA 94720

<sup>c</sup>Present address: College of Dentistry, New York University, E24th St., New York, NY 10010

**Key words:** membranes | transport | permease | membrane proteins | efflux | counterflow | electrochemical H<sup>+</sup> gradient

\* **Corresponding author:** E-mail: rkaback@mednet.ucla.edu. Phone: (310) 206-5053. Fax: (310) 206-8623.

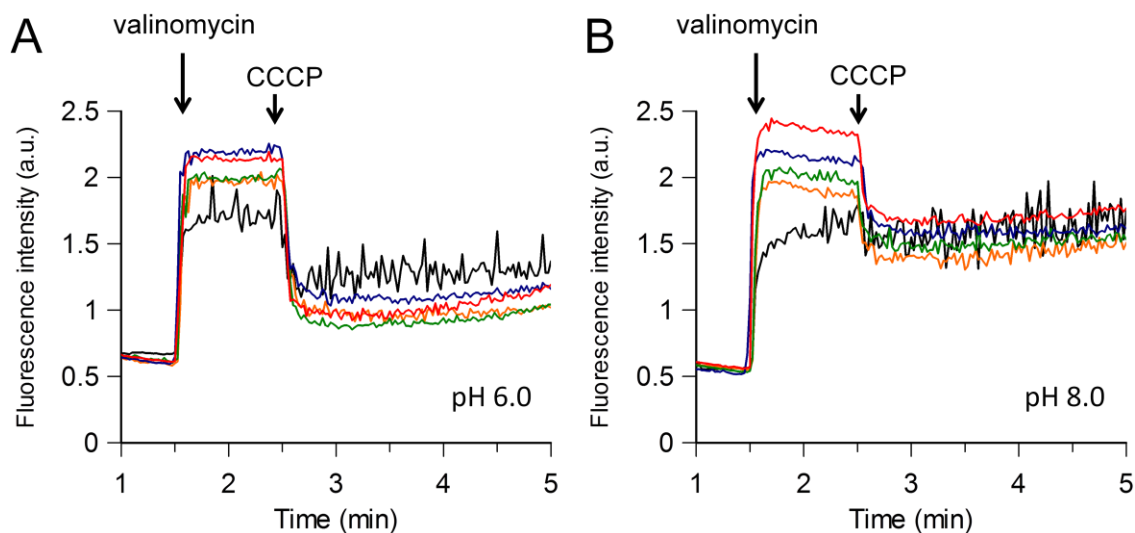

**Fig. S1. Assessment of imposed membrane potential (*interior positive*) by potential-sensitive oxonal dye DiBAC4(3).** RSO membrane vesicles at a protein concentration of 2 mg/mL in 100 mM NaPi at pH 6.0 (A) or pH 8.0 (B) were incubated with 4  $\mu$ M DiBAC4(3) at 25  $^{\circ}$ C for 30 min, then 50  $\mu$ L of RSO membrane vesicles were diluted into 2 mL of 100 mM phosphate buffer at a given ratio of  $\text{Na}^+/\text{K}^+$  at the same pH (black: no potassium, orange: 25% potassium, green: 50% potassium, blue: 75% potassium and red: 100% potassium). Fluorescence emission of DiBAC4(3) was monitored at 516 nm with excitation at 490 nm. Where indicated by the arrows, valinomycin or CCCP was added to a final concentration of 25  $\mu$ M, respectively. Based on the percentage of fluorescence change at each tested pH, a membrane potential of at least +75 mV was estimated upon dilution into pure  $\text{KPi}$ .

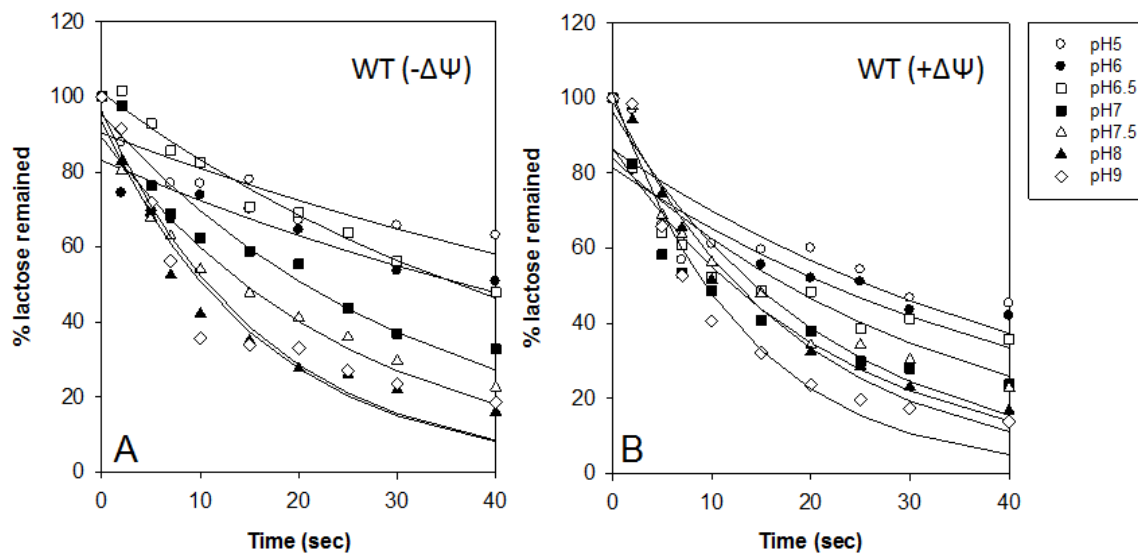

**Fig. S2.** Efflux by RSO vesicles with WT LacY in the absence (A) or presence (B) of  $\Delta\Psi$  (*interior positive*) at different pHs. Efflux experiments were performed as described in *Materials and Methods* and data are plotted as an exponential fit.

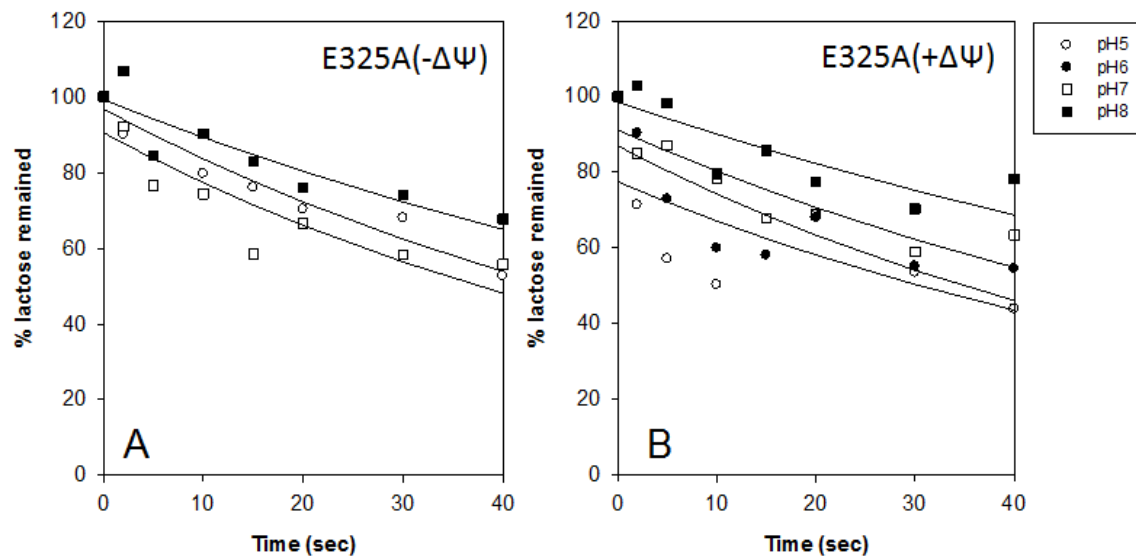

**Fig. S3.** Efflux by RSO vesicles with mutant E325A LacY in the absence (A) or presence (B) of  $\Delta\Psi$  (*interior positive*) at different pHs. Efflux experiments were performed as described in *Materials and Methods* and data are plotted as an exponential fit.

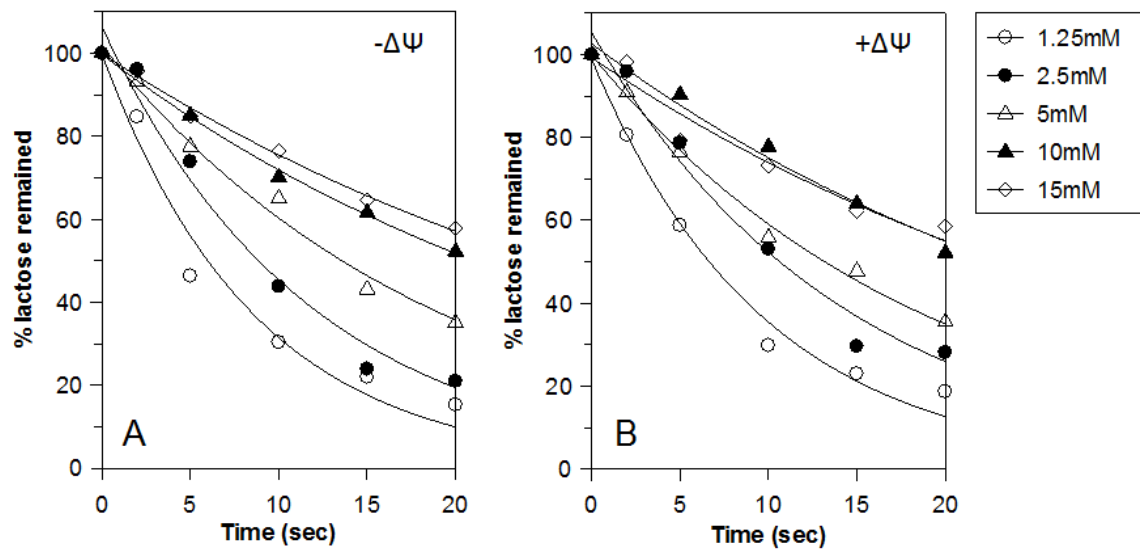

**Fig. S4.** Efflux by RSO vesicles with WT LacY equilibrated with different concentrations of [<sup>14</sup>C]lactose in the absence (A) or presence (B) of  $\Delta\Psi$  (*interior positive*) at pH7.5. Efflux experiments were performed as described in *Materials and Methods* and data are plotted as an exponential fit.

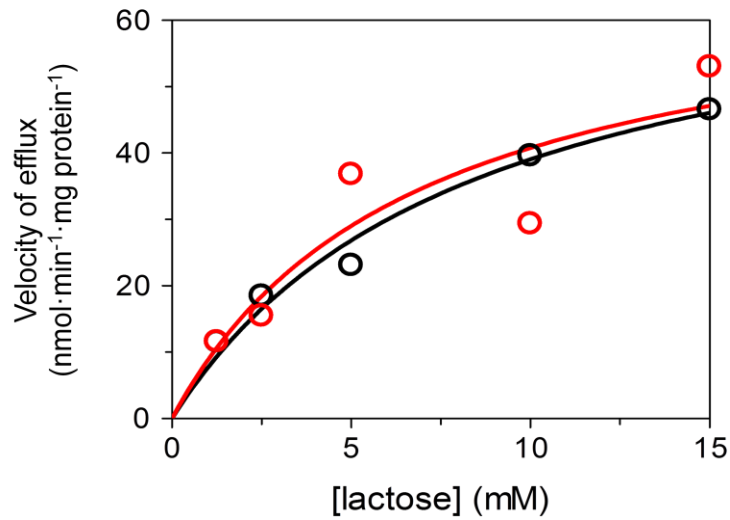

**Fig. S5. Effect of imposed  $\Delta\Psi$  (*interior positive*) on the kinetics of lactose efflux.** RSO membrane vesicles were equilibrated with [<sup>14</sup>C]lactose at given concentrations overnight at 4°C, then efflux experiments in the absence (black) and presence of  $\Delta\Psi$  (*interior positive*) (red) were performed at pH 7.5 as described in *Materials and Methods*.  $K_m$  and  $V_{max}$  were obtained by plotting the amount of lactose effluxed in the first 10s as a function of lactose concentration with Michaelis–Menten equation.
